# Supplementary material
Source: PubMed Central journal article supplement (PMC2765676)
Supplement: blood-2008-12-195214_1.pdf [file blood-2008-12-195214_1.pdf]

| <b>Mean ± SEM</b> | <b>GFP+CD3+</b>   | <b>GFP+Ly6G+</b>  | <b>GFP+CD11b+</b> | <b>GFP+B220+</b>   |
|-------------------|-------------------|-------------------|-------------------|--------------------|
| <b>Mieg3</b>      | <b>19.4 ± 7.6</b> | <b>40.7 ± 2.5</b> | <b>56.6 ± 6.0</b> | <b>34.2 ± 9.8</b>  |
| <b>Rheb2</b>      | <b>30.8 ± 8.3</b> | <b>34.6 ± 1.2</b> | <b>44.3 ± 3.4</b> | <b>55.2 ± 10.5</b> |

No significant differences between Mieg3 and Rheb2
